# Supplementary material
Source: HighWire-hosted journal article supplement (https://bjsm.bmj.com/content/58/3/164)
Supplement: inline-supplementary-material-1 [file inline-supplementary-material-1.pdf]

## Supplementary Material

**Table S1: A Posteriori Changes to Scoping Review Protocol**

| <b>Date</b> | <b>Description of Change</b>                                                                                                                  | <b>Reason for Change</b>                                                                                                           |
|-------------|-----------------------------------------------------------------------------------------------------------------------------------------------|------------------------------------------------------------------------------------------------------------------------------------|
|             | Research Questions narrowed into two questions intent on capturing existing focus areas and methodology of health disparities research in SEM | Based on systematic searches with the librarian, too many articles would be identified to complete project in appropriate timeline |
|             | Decision made to only include articles related to organized sport                                                                             | Project would be infeasible if general physical activity articles were included due to large volume of articles identified         |

**Table S2: Database Search Strategies**

### PubMed

("Athletes"[mesh] OR "Athletic Injuries"[mesh] OR "Sports"[mesh] OR "Sports Medicine"[Mesh] OR athlet\*[tw] OR sport\*[tw]) AND ( "Health Services Accessibility"[mesh] OR "Health Equity"[mesh] OR "Healthcare Disparities"[Mesh] OR "Health Inequities"[Mesh] OR "Health Status Disparities"[mesh] OR "Culturally Competent Care"[mesh] OR "Social Determinants of Health"[mesh] OR culturally-competen\*[tw] OR culture-competen\*[tw] OR ((health\*[tw] OR medical[tw] OR medicine[tw]) AND (disparit\*[tw] OR inequit\*[tw] OR equit\*[tw] OR equalit\*[tw] OR inequalit\*[tw] OR barrier\*[tw] OR facilitator\*[tw] OR access[tw] OR accessibilit\*[tw] OR stereotyp\*[tw] OR prejudice\*[tw] OR determinant\*[tw] OR advantaged[tw] OR disadvantaged[tw])))

---

### Scopus

(TITLE-ABS-KEY(athlet\* OR sport\*)) AND (TITLE-ABS-KEY((cultur\* W/3 (competen\*)) OR TITLE-ABS-KEY((health\* OR medical OR medicine) W/15 (disparit\* OR inequit\* OR equit\* OR equalit\* OR inequalit\* OR barrier\* OR facilitator\* OR access OR accessibilit\* OR stereotyp\* OR prejudice\* OR determinant\* OR advantaged OR disadvantaged)))

---

**SPORTDiscus**

(SU (athlet\* OR sport\*) OR TI (athlet\* OR sport\*) OR AB (athlet\* OR sport\*) OR KW (athlet\* OR sport\*)) AND (SU ((cultur\*) N3 (competen\*)) OR TI ((cultur\*) N3 (competen\*)) OR AB ((cultur\*) N3 (competen\*)) OR KW ((cultur\*) N3 (competen\*))) OR SU ((health\* OR medical OR medicine) N15 (disparit\* OR inequit\* OR equit\* OR equalit\* OR inequalit\* OR barrier\* OR facilitator\* OR access OR accessibilit\* OR stereotyp\* OR prejudice\* OR determinant\* OR advantaged OR disadvantaged)) OR TI ((health\* OR medical OR medicine) N15 (disparit\* OR inequit\* OR equit\* OR equalit\* OR inequalit\* OR barrier\* OR facilitator\* OR access OR accessibilit\* OR stereotyp\* OR prejudice\* OR determinant\* OR advantaged OR disadvantaged)) OR AB ((health\* OR medical OR medicine) N15 (disparit\* OR inequit\* OR equit\* OR equalit\* OR inequalit\* OR barrier\* OR facilitator\* OR access OR accessibilit\* OR stereotyp\* OR prejudice\* OR determinant\* OR advantaged OR disadvantaged)) OR KW ((health\* OR medical OR medicine) N15 (disparit\* OR inequit\* OR equit\* OR equalit\* OR inequalit\* OR barrier\* OR facilitator\* OR access OR accessibilit\* OR stereotyp\* OR prejudice\* OR determinant\* OR advantaged OR disadvantaged)))

---

**CINAHLPlus with Full Text**

(MH ("Athletes+" OR "Athletic Injuries+" OR "Sports+" OR "Sports Medicine+") OR TI (athlet\* OR sport\*) OR AB (athlet\* OR sport\*) OR SU (athlet\* OR sport\*)) AND (MH("Health Services Accessibility+" OR "Healthcare Disparities" OR "Health Inequities" OR "Health Status Disparities" OR "Cultural Competence" OR "Cultural Safety" OR "Social Determinants of Health") OR TI ((cultur\*) N3 (competen\*)) OR AB ((cultur\*) N3 (competen\*)) OR SU ((cultur\*) N3 (competen\*)) OR TI ((health\* OR medical OR medicine) N15 (disparit\* OR inequit\* OR equit\* OR equalit\* OR inequalit\* OR barrier\* OR facilitator\* OR access OR accessibilit\* OR stereotyp\* OR prejudice\* OR determinant\* OR advantaged OR disadvantaged)) OR AB ((health\* OR medical OR medicine) N15 (disparit\* OR inequit\* OR equit\* OR equalit\* OR inequalit\* OR barrier\* OR facilitator\* OR access OR accessibilit\* OR stereotyp\* OR prejudice\* OR determinant\* OR advantaged OR disadvantaged)) OR SU ((health\* OR medical OR medicine) N15 (disparit\* OR inequit\* OR equit\* OR equalit\* OR inequalit\* OR barrier\* OR facilitator\* OR access OR accessibilit\* OR stereotyp\* OR prejudice\* OR determinant\* OR advantaged OR disadvantaged)))

---

**Science Citation Index-Expanded, Social Sciences Index, Emerging Sources Index (Web of Science)**

(TS=(athlet\* OR sport\*)) AND (TS=((cultur\*) NEAR/3 (competen\*)) OR TS=((health\* OR medical OR medicine) NEAR/15 (disparit\* OR inequit\* OR equit\* OR equalit\* OR inequalit\* OR barrier\* OR facilitator\* OR access OR accessibilit\* OR stereotyp\* OR prejudice\* OR determinant\* OR advantaged OR disadvantaged)))

---

**CENTRAL**

((athlet\* OR sport\*) AND (((cultur\*) NEAR/3 (competen\*)) OR ((health\* OR medical OR medicine) NEAR/15 (disparit\* OR inequit\* OR equit\* OR equalit\* OR inequalit\* OR barrier\* OR facilitator\* OR access OR accessibilit\* OR stereotyp\* OR prejudice\* OR determinant\* OR advantaged OR disadvantaged)))):ti,ab,kw

**Table S3: Databases searched**

| Database searched                                                                                                          | Date searched | Results       |
|----------------------------------------------------------------------------------------------------------------------------|---------------|---------------|
| PubMed                                                                                                                     | 06/06/2022    | <b>6,739</b>  |
| Scopus (Elsevier)                                                                                                          | 06/06/2022    | <b>2,638</b>  |
| SPORTDiscus (EBSCO)                                                                                                        | 06/06/2022    | <b>971</b>    |
| CINAHLPlus with Full-Text (EBSCO)                                                                                          | 06/06/2022    | <b>1,441</b>  |
| Web of Science Core Collection (Clarivate): Science Citation Index-Expanded, Social Sciences Index, Emerging Sources Index | 06/06/2022    | <b>2,051</b>  |
| Cochrane CENTRAL (Wiley)                                                                                                   | 06/06/2022    | <b>134</b>    |
|                                                                                                                            |               |               |
| Total                                                                                                                      |               | <b>13,974</b> |
| Total after librarian de-duplication                                                                                       |               | <b>9,360</b>  |
| Total after Covidence de-duplication                                                                                       |               | <b>9,355</b>  |

**Table S4 Primary Domain and Possible Causes of Health Disparities Assessed in Included Studies**

| Study            | Primary Domain                       | Possible Causes of Health Disparities*  |
|------------------|--------------------------------------|-----------------------------------------|
| Allahabadi 2022  | Access to SEM Care                   | Insurance; Race/Ethnicity; Sex          |
| Attia 2021       | Provider representation in SEM       | Sex                                     |
| Austin 2022      | Health-related outcomes in SEM       | Race/Ethnicity                          |
| Ballesteros 2020 | Access to SEM Care                   | Race/Ethnicity                          |
| Baraga 2012      | Access to SEM Care                   | Age; Insurance                          |
| Barfield 2013    | Access to and participation in Sport | Ability(P)                              |
| Baria 2015       | Access to and participation in Sport | Ability(P)                              |
| Barter 2023      | Access to SEM Care                   | SES                                     |
| Beck 2020        | Access to SEM Care                   | Age; Insurance; Language; Location; Sex |
| Bopp 2017        | Access to and participation in Sport | Race/Ethnicity                          |

|                   |                                      |                                                                     |
|-------------------|--------------------------------------|---------------------------------------------------------------------|
| Bram 2020         | Heath-related outcomes in SEM        | Insurance; Race/Ethnicity                                           |
| Braza 2018        | Access to and participation in Sport | Ability(P); Race/Ethnicity                                          |
| Brown 2022        | Heath-related outcomes in SEM        | Race/Ethnicity; SES                                                 |
| Brown 2018        | Access to and participation in Sport | Race/Ethnicity; Sex                                                 |
| Brown 2023        | Heath-related outcomes in SEM        | Insurance; Race/Ethnicity                                           |
| Budavari 2022     | Access to and participation in Sport | Ability(I); SES                                                     |
| Calzo 2014        | Access to and participation in Sport | Sexual Orientation; Sex                                             |
| Cohen 2007        | Access to and participation in Sport | Education; SES                                                      |
| Copley 2020       | Access to SEM Care                   | Insurance; Language; Nationality                                    |
| Côté-Leclerc 2017 | Heath-related outcomes in SEM        | Ability(P)                                                          |
| Couch 2023        | Heath-related outcomes in SEM        | Athletic Identity; Race/Ethnicity; Sex                              |
| Crissey 2006      | Access to and participation in Sport | Body Composition; Race/Ethnicity                                    |
| Day 2021          | Provider representation in SEM       | Race/Ethnicity; Sex                                                 |
| Deaner 2012       | Access to and participation in Sport | Sex                                                                 |
| Donohue 2022      | Access to SEM Care                   | Race/Ethnicity; SES                                                 |
| Drake 2015        | Access to and participation in Sport | Sex                                                                 |
| Eberman 2021      | Access to SEM Care                   | Gender Identity; Sexual Orientation                                 |
| Foley 2014        | Heath-related outcomes in SEM        | Ability(I); Body Composition                                        |
| Greenley 2018     | Access to and participation in Sport | Ability(P)                                                          |
| Hannon 2006       | Access to and participation in Sport | SES                                                                 |
| Harrington 2017   | Access to and participation in Sport | SES                                                                 |
| Heinze 2018       | Access to and participation in Sport | SES                                                                 |
| Holmes 2016       | Heath-related outcomes in SEM        | Age; Race/Ethnicity; SES; Sex                                       |
| Hyde 2020         | Access to and participation in Sport | Age; Race/Ethnicity; SES; Sex                                       |
| Iverson 2021      | Access to and participation in Sport | Ability(I)                                                          |
| Johnson 2022      | Access to and participation in Sport | SES; Sex                                                            |
| Johnston 2019     | Access to and participation in Sport | Race/Ethnicity; SES; Sex                                            |
| Kellstedt 2021    | Access to and participation in Sport | Age; SES; Sex                                                       |
| Kopka 2021        | Access to SEM Care                   | Age; Sex                                                            |
| Kroshus 2017      | Access to SEM Care                   | Location; SES                                                       |
| Kroshus 2019 A    | Access to and participation in Sport | SES                                                                 |
| Kroshus 2019 B    | Access to SEM Care                   | Nationality                                                         |
| Kurc 2009         | Access to and participation in Sport | Body Composition; Sex                                               |
| Lape 2018         | Access to and participation in Sport | Ability(P)                                                          |
| Lawler 2012       | Heath-related outcomes in SEM        | Race/Ethnicity                                                      |
| Lawrence 2017     | Access to and participation in Sport | Race/Ethnicity; SES                                                 |
| Lemez 2018        | Heath-related outcomes in SEM        | Age; Body Composition; Occupational Characteristics; Race/Ethnicity |

|                  |                                      |                                                |
|------------------|--------------------------------------|------------------------------------------------|
| Long 2017        | Access to SEM Care                   | Location; SES                                  |
| Marquis 2015     | Access to and participation in Sport | Ability(I)                                     |
| Mason 2019       | Access to and participation in Sport | Nationality                                    |
| Matar 2021       | Access to SEM Care                   | Insurance; Location                            |
| McGuine 2021     | Health-related outcomes in SEM       | SES; Sex                                       |
| McLoughlin 2017  | Access to and participation in Sport | Ability(P)                                     |
| McMillan 2016    | Access to and participation in Sport | Family Structure; SES                          |
| Mereish 2015     | Access to and participation in Sport | Sexual Orientation                             |
| Moore 2021       | Provider representation in SEM       | Age; Race/Ethnicity; Sex                       |
| Munson 2021      | Access to SEM Care                   | Gender Identity                                |
| Naar 2017        | Access to and participation in Sport | Age                                            |
| Ness 2012        | Access to and participation in Sport | Body Composition; Race/Ethnicity; SES          |
| Nye 2019         | Access to SEM Care                   | Gender Identity; Sexual Orientation            |
| Okamoto 2013     | Access to and participation in Sport | Nationality; SES                               |
| Olson 2021       | Access to SEM care                   | Insurance                                      |
| Patel 2021       | Access to SEM care                   | Insurance                                      |
| Pharr 2020       | Access to and participation in Sport | Age; Education; Race/Ethnicity; SES            |
| Pike 2017        | Provider representation in SEM       | Sex                                            |
| Post 2019 A      | Access to SEM Care                   | SES                                            |
| Post 2019 B      | Access to SEM Care                   | SES                                            |
| Ramey 2020       | Access to SEM Care                   | Ability(P)                                     |
| Ramkumar 2019    | Methodology                          | Age; Education Level; Sex                      |
| Roberts 2020     | Health-related outcomes in SEM       | Race/Ethnicity                                 |
| Rogers 2018      | Access to SEM Care                   | Insurance; SES                                 |
| Ross 2020        | Access to and participation in Sport | Ability(I); Ability(P)                         |
| Ross 2021        | Access to and participation in Sport | Ability(I); Ability(P)                         |
| Saint Onge 2011  | Access to and participation in Sport | Education; Race/Ethnicity                      |
| SayedAhmed 2018  | Access to and participation in Sport | Ability(P)                                     |
| Schinke 2010     | Access to and participation in Sport | Nationality                                    |
| Schober 2015     | Access to and participation in Sport | Race/Ethnicity                                 |
| Shi 2020         | Access to SEM Care                   | Insurance                                      |
| Shirazipour 2015 | Access to and participation in Sport | Ability(P)                                     |
| Simpson 2005     | Health-related outcomes in SEM       | SES                                            |
| Singh 2008       | Access to and participation in Sport | Nationality; Race/Ethnicity                    |
| Siple 2018       | Provider representation in SEM       | Race/Ethnicity; Sex                            |
| Sirard 2006      | Access to and participation in Sport | Sex                                            |
| Stanish 2015     | Access to and participation in Sport | Ability(I)                                     |
| Su 2019          | Health related outcomes in SEM       | Age; Education; Insurance; Race/Ethnicity; Sex |
| Thomas 2019      | Access to and participation in Sport | Sex                                            |

|                 |                                      |                                     |
|-----------------|--------------------------------------|-------------------------------------|
| Tran 2021       | Health related outcomes in SEM       | Race/Ethnicity                      |
| Tran 2022       | Health-related outcomes in SEM       | Age; Race/Ethnicity; SES; Sex       |
| Tran 2023       | Health-related outcomes in SEM       | Race/Ethnicity                      |
| Walen 2020      | Access to SEM Care                   | Gender Identity; Sexual Orientation |
| Wallace 2017    | Access to SEM Care                   | Location                            |
| Wallace 2018 A  | Health-related outcomes in SEM       | Race/Ethnicity                      |
| Wallace 2018 B  | Health-related outcomes in SEM       | Race/Ethnicity                      |
| Wallace 2021 A  | Health-related outcomes in SEM       | Race/Ethnicity; Sex                 |
| Wallace 2021 B  | Health-related outcomes in SEM       | Race/Ethnicity                      |
| Wallace 2022 A  | Health-related outcomes in SEM       | Race/Ethnicity                      |
| Wallace 2022 B  | Access to SEM Care                   | Race/Ethnicity                      |
| Wallace 2023    | Health-related outcomes in SEM       | Race/Ethnicity; Sex                 |
| West 2019       | Access to and participation in Sport | Age                                 |
| Wilkerson 2020  | Access to SEM Care                   | Race/Ethnicity                      |
| Williams 2017   | Access to SEM Care                   | Insurance                           |
| Wiznia 2017     | Access to SEM Care                   | Insurance                           |
| Yengo-Kahn 2021 | Health-related outcomes in SEM       | Race/Ethnicity                      |

SEM=Sports Medicine; SES=socioeconomic status; Ability(P)=physical ability; Ability(I)= Intellectual ability; Location represents urban/suburban/rural

**Table S5: Methodological Characteristics of Included Studies**

| Study ID         | Study design    | Population description                                  | Num. of participants | Measurement Instrument Used for Possible Causes of Health Disparities            | Other Standardized Instruments or National Databases Used                                                                                                           | Primary Outcome                                 |
|------------------|-----------------|---------------------------------------------------------|----------------------|----------------------------------------------------------------------------------|---------------------------------------------------------------------------------------------------------------------------------------------------------------------|-------------------------------------------------|
| Allahabadi 2022  | Cross sectional | Pediatric/adolescent patients with patellar instability | 78                   | Insurance Status                                                                 | n/a                                                                                                                                                                 | delays in care                                  |
| Attia 2021       | Cross sectional | Executive directors of US Orthopedic Societies          | 14                   | Self-report                                                                      | n/a                                                                                                                                                                 | Representation of women in orthopedic societies |
| Austin 2022      | Cohort          | High school and club basketball players                 | 60                   | n/a                                                                              | National Center for Catastrophic Sports Injury Research (NCCSIR)                                                                                                    | survival to hospital discharge                  |
| Ballesteros 2020 | Cross sectional | racial ethnic minority student athletes                 | 241                  | Self-report                                                                      | Fall 2015 American College Health Assessment (ACHA) - National College Health Assessment (NCHA)-II data set                                                         | access to mental health services                |
| Baraga 2012      | Cross sectional | Patients with ACL tears                                 | 80                   | Self-report                                                                      | n/a                                                                                                                                                                 | Treatment delays, number of visits              |
| Barfield 2013    | Cross sectional | National power wheelchair soccer competitors            | 25                   | Self-report                                                                      | Exercise Benefits and Barriers Scale (EBBS)                                                                                                                         | Perceived benefits and barriers of exercising   |
| Baria 2015       | Cross sectional | youth wrestlers with limb deficiencies                  | 16                   | Self-report                                                                      | n/a                                                                                                                                                                 | Benefits and barriers to wrestling              |
| Barter 2023      | Cross sectional | Public high schools                                     | 3482 (schools)       | Free and Reduced Lunch - National Center for Educational Statistics; Census Data | Athletic Training Location and Services (ATLAS) 115 database, the U.S. Census Bureau, and the National Center for Education Statistics (NCES) in the Spring of 2020 | Access to athletic training services            |

|               |                 |                                                                                 |      |                               |                                                                                                                                    |                                                                                                                                  |
|---------------|-----------------|---------------------------------------------------------------------------------|------|-------------------------------|------------------------------------------------------------------------------------------------------------------------------------|----------------------------------------------------------------------------------------------------------------------------------|
| Beck 2020     | Cross sectional | Pediatric sports medicine patients                                              | 168  | Insurance Status              | Electronic Medical Record                                                                                                          | Time to MRI; MRI results                                                                                                         |
| Bopp 2017     | Cross sectional | Undergraduate students in sport management classes                              | 676  | Self-report                   | n/a                                                                                                                                | perceived level of welcomeness                                                                                                   |
| Bram 2020     | Cross sectional | Pediatric ACLR patients                                                         | 915  | Insurance Status              | Electronic Medical Record                                                                                                          | days to surgery, outcomes of meniscectomy from delay to surgery, strength and range of motion disparities at long term follow-up |
| Braza 2018    | Cross sectional | Individuals with disabilities; caretakers; community members without disability | 76   | Self-report                   | n/a                                                                                                                                | Awareness and perceived barriers of adaptive sports and recreating opportunities                                                 |
| Brown 2018    | Qualitative     | Black women triathletes                                                         | 12   | Self-report                   | n/a                                                                                                                                | motives for triathlon participation                                                                                              |
| Brown 2021    | Cross sectional | NCAA Division III athletes                                                      | 728  | Self-report                   | United States Department of Agriculture (USDA) 6-item food insecurity survey                                                       | prevalence of food security                                                                                                      |
| Brown 2022    | Cross sectional | Orthopedic patients with hip-related concerns                                   | 2789 | Insurance Status; Self-report | Electronic Medical Record                                                                                                          | patients seen with hip disabilities; number of MRIs performed; surgery recommendations                                           |
| Budavari 2021 | Cross sectional | Children with autism spectrum disorder                                          | 1302 | Self-report                   | National Survey of Children's Health (NSCH 2016, 2017, and 2018; Child and Adolescent Health Measurement Initiative (CAHMI), 2017, | participation in extracurricular activities (sport)                                                                              |



|                   |                 |                                                                      |                                    |                                                                    |                                                                                                                             |                                                                       |
|-------------------|-----------------|----------------------------------------------------------------------|------------------------------------|--------------------------------------------------------------------|-----------------------------------------------------------------------------------------------------------------------------|-----------------------------------------------------------------------|
|                   |                 |                                                                      |                                    |                                                                    | 2019, 2021)                                                                                                                 |                                                                       |
| Calzo 2014        | Cross sectional | Adolescents and young adults                                         | 12,779                             | Self-report                                                        | n/a                                                                                                                         | Team sport participation                                              |
| Cohen 2007        | Cross sectional | LA County public high schools                                        | 175 (schools)                      | Free and Reduced Lunch (FARL) - California Department of Education | n/a                                                                                                                         | Opportunities for participation in high school extracurricular sports |
| Copley 2020       | Cross sectional | Youth with concussion or fracture                                    | 25,294                             | Insurance Status                                                   | Electronic Medical Record                                                                                                   | youth being seeing for concussion or fracture                         |
| Côté-Leclerc 2017 | Mixed Methods   | adult wheelchair users                                               | 34                                 | Self-report                                                        | n/a                                                                                                                         | Quality of Life                                                       |
| Couch 2023        | Qualitative     | US Olympic African American female track athletes                    | 10                                 | Self-report                                                        | n/a                                                                                                                         | Lived experiences of Olympic level athletes                           |
| Crissey 2006      | Cross sectional | Adolescent students                                                  | 7214                               | Self-report                                                        | n/a                                                                                                                         | perceptions of weight and weight loss                                 |
| Day 2021          | Cross sectional | NCAA-associated Athletic Trainers                                    | 5168                               | NCAA Database                                                      | NCAA Minority Opportunities and Interests Committee's Demographic Database of NCAA Member Institutions' Athletics Personnel | Prevalence of BIPOC athletic trainers                                 |
| Deaner 2012       | Cross sectional | youth and collegiate individuals participating in sport and exercise | 112,000 (study 1); 2,879 (study 2) | Self-report                                                        | n/a                                                                                                                         | individual and team sport participation                               |
| Donohue 2022      | Cohort          | African American youth athletes                                      | 13                                 | Self-report                                                        | The Optimum Performance Program in Sports (TOPPS) was formally adapted from                                                 | Efficacy of mental health intervention                                |

|                 |                 |                                                                  |      |                                                |                                                                                                                        |                                                                                               |
|-----------------|-----------------|------------------------------------------------------------------|------|------------------------------------------------|------------------------------------------------------------------------------------------------------------------------|-----------------------------------------------------------------------------------------------|
|                 |                 |                                                                  |      |                                                | Family Behavior Therapy (FBT)                                                                                          |                                                                                               |
| Drake 2015      | Cohort          | Elementary & High School Students                                | 1244 | Self-report                                    | n/a                                                                                                                    | High school team sport participation                                                          |
| Eberman 2021    | Mixed Methods   | NCAA and NAIA athletic trainers                                  | 15   | Self-report                                    | n/a                                                                                                                    | Athletic trainer knowledge and experience regarding health care needs of transgender athletes |
| Foley 2014      | Cross sectional | Youth Special Olympics athletes                                  | 2541 | Self-report                                    | Healthy Athletes Database                                                                                              | BMI                                                                                           |
| Greenley 2018   | Cohort          | Youth with inflammatory bowel disease                            | 450  | Self-report                                    | n/a                                                                                                                    | perceived sport participation impairment                                                      |
| Hannon 2006     | Cross sectional | Boston youth involved in after school physical activity programs | n/a  | Play Across Boston Program Census              | n/a                                                                                                                    | ratio of youth to facilities; ratio of youth to programs                                      |
| Harrington 2017 | Cross sectional | parents of children <18                                          | 3206 | Self-report                                    | Postal Code Conversion File (PCCF); Ontario Marginalization index (On-Marg); Canadian Marginalization Index (CAN-Marg) | access to facilities in sports and recreation                                                 |
| Heinze 2018     | Qualitative     | School boards in Midwest City                                    | 24   | School District Data (median household income) | n/a                                                                                                                    | Initiation of pay-to-pay and decision to discontinue for sport participation                  |
| Holmes 2016     | Cross sectional | children diagnosed with sports-related concussion                | 1429 | Self-report                                    | Electronic Medical Record                                                                                              | cognitive related symptoms of sport related concussion                                        |

|                |                 |                                                                                          |                              |                                                              |                                                                                                                               |                                                                                          |
|----------------|-----------------|------------------------------------------------------------------------------------------|------------------------------|--------------------------------------------------------------|-------------------------------------------------------------------------------------------------------------------------------|------------------------------------------------------------------------------------------|
| Hyde 2020      | Cross sectional | youth athletes                                                                           | 36,779                       | Self-report                                                  | 2017-2018 National Survey of Children's Health (NSCH)                                                                         | youth sport participation                                                                |
| Iverson 2021   | Mixed Methods   | adults with a disability and parents of children with a disability                       | 344                          | Self-report                                                  | n/a                                                                                                                           | barriers and facilitators of participation in adaptive sport                             |
| Johnson 2022   | Cross sectional | youth ages 6-17 in the united states                                                     | 30,029                       | Metropolitan Statistical Area Status                         | 2018-2019 National Survey of Children's Health (NSCH)                                                                         | sport participation                                                                      |
| Johnston 2019  | Qualitative     | urban girls who participated in REACH                                                    | 12                           | Self-report                                                  | n/a                                                                                                                           | girls' experiences in the REACH program (sport based physical activity)                  |
| Kellstedt 2021 | Cross sectional | 3rd-6th grade children in rural communities                                              | 418                          | Self-report                                                  | n/a                                                                                                                           | youth sport participation                                                                |
| Kopka 2021     | Cross sectional | Orthopedic surgery patients                                                              | 313                          | Self-report                                                  | n/a                                                                                                                           | access to pre or post-operative sports medicine resources, physical and emotional health |
| Kroshus 2017   | Cross sectional | football and soccer coaches at state of Washington public high schools                   | 270                          | Free and Reduced Lunch (FARL) - Washington State Report Card | Office of Superintendent of Public Instruction Washington State Report Card                                                   | presence (access to) of athletic trainer; number of diagnosed concussions                |
| Kroshus 2019 A | Cross sectional | youth flag football athletes                                                             | 372 (football organizations) | Census Data; Rural-Urban Commuting Areas (RUCA) Codes        | 2015 American Community Survey (ACS) 5-year estimates, the 2010 US Census and the Rural-Urban Commuting Areas (RUCA) database | flag football participation                                                              |
| Kroshus 2019 B | Cross sectional | US high school athletic associations and other organizations associated with youth sport | 76 (organizations)           | n/a                                                          | n/a                                                                                                                           | readability, accessibility, and completeness of Spanish                                  |

|               |                 |                                                                                      |               |                                                                                                                                                                   |                                                                                                                         |                                                                                                             |
|---------------|-----------------|--------------------------------------------------------------------------------------|---------------|-------------------------------------------------------------------------------------------------------------------------------------------------------------------|-------------------------------------------------------------------------------------------------------------------------|-------------------------------------------------------------------------------------------------------------|
|               |                 |                                                                                      |               |                                                                                                                                                                   |                                                                                                                         | translations for concussion education                                                                       |
| Kurc 2009     | Cross sectional | High School students                                                                 | 22,398        | Self-report                                                                                                                                                       | n/a                                                                                                                     | school and community based sport participation                                                              |
| Lape 2018     | Qualitative     | Adults participating in community based adaptive sport                               | 17            | Self-report                                                                                                                                                       | n/a                                                                                                                     | participant-reported facilitators or barriers to participation in a community-based adaptive sports program |
| Lawler 2012   | Cross sectional | Retired professional male basketball players                                         | 3366          | n/a                                                                                                                                                               | National Basketball Association (NBA) database including the other 2 previous leagues; Center for Disease Control (CDC) | Survival                                                                                                    |
| Lawrence 2017 | Cross sectional | Olympic athletes                                                                     | 2,211         | Race Access Index(RAI); Socio-economic Access Index (SAI); Combined Race Socio-economic Access Index (CAI) were developed, modified from the College Access Index | n/a                                                                                                                     | Sociodemographic characteristic of Olympic athletes                                                         |
| Lemez 2018    | Cross sectional | deceased National Basketball Association and American Basketball Association players | 787           | n/a                                                                                                                                                               | National Basketball Association (NBA) database and American Basketball Association (ABA)                                | Mortality outcomes                                                                                          |
| Long 2017     | Cross sectional | North Carolina High School Athletic Association Schools                              | 393 (schools) | Self-report                                                                                                                                                       | North Carolina High School Athletic Association (NCHSAA) database                                                       | access to athletic training services                                                                        |

|                 |                                        |                                                                                           |              |                                                                                                                                                  |                                                                                                                                                                |                                                                     |
|-----------------|----------------------------------------|-------------------------------------------------------------------------------------------|--------------|--------------------------------------------------------------------------------------------------------------------------------------------------|----------------------------------------------------------------------------------------------------------------------------------------------------------------|---------------------------------------------------------------------|
| Marquis 2015    | Cross sectional                        | Youth with and without developmental delays                                               | 161          | Child Behavior Check list for ages 6-18 (CBCL); Bayley Scales of Infant Development-II (BSID-II); Stanford-Binet Intelligence Scale: 4th edition | n/a                                                                                                                                                            | sport participation                                                 |
| Mason 2019      | Community-based participatory research | indigenous youth                                                                          | 41           | Self-report                                                                                                                                      | n/a                                                                                                                                                            | participation in organized sport                                    |
| Matar 2021      | Cross sectional                        | Sports medicine patients seeking care in outpatient orthopedic clinic                     | 88 (clinics) | n/a                                                                                                                                              | Ohio Orthopaedic Society (OOS) and American Orthopaedic Society for Sports Medicine (AOSSM) directories                                                        | Access to care                                                      |
| McGuine 2021    | Cross sectional                        | High school aged athletes                                                                 | 13,002       | Census Data (% individuals <18 in poverty); Self-report                                                                                          | n/a                                                                                                                                                            | mental health, Physical Activity and Quality of Life                |
| McLoughlin 2017 | Qualitative                            | elite athletes with a physical disability                                                 | 23           | Self-report                                                                                                                                      | Self-Determination Theory (SDT); Social Model of Disability                                                                                                    | Motivations, barriers and facilitators of sport participation       |
| McMillan 2016   | Cross sectional                        | Canadian youth grades 6-10                                                                | 21,201       | Self-report                                                                                                                                      | 2009–10 Canadian Health Behaviour in School-aged Children Survey (HBSC)                                                                                        | Sport participation                                                 |
| Mereish 2015    | Cross sectional                        | Wisconsin high school students                                                            | 13,933       | Self-report                                                                                                                                      | 2012 Dane County Youth Assessment                                                                                                                              | sport participation                                                 |
| Moore 2021      | Cross sectional                        | orthopaedic sports medicine fellowship directors                                          | 88           | Self-report                                                                                                                                      | The American Orthopaedic Society for Sports Medicine (AOSSM) Orthopaedic Sports Medicine Fellowship Listing for 2020 to 2021; SF Match 2020 fellowship listing | characteristics of orthopaedic sports medicine fellowship directors |
| Munson 2021     | Qualitative                            | LGBT athletes who list their gender identity differently from their sex assigned at birth | 9            | Self-report                                                                                                                                      | n/a                                                                                                                                                            | Experiences with athletic trainers and barriers to                  |

|              |                 |                                           |                |                  |                                                                                               |                                                                          |
|--------------|-----------------|-------------------------------------------|----------------|------------------|-----------------------------------------------------------------------------------------------|--------------------------------------------------------------------------|
|              |                 |                                           |                |                  |                                                                                               | seeking care                                                             |
| Naar 2017    | Qualitative     | Mid- to late- adulthood women             | 64             | self-report      | n/a                                                                                           | factors influencing older women's participation in competitive softball. |
| Ness 2012    | Cross sectional | Non-Hispanic White and AI/AN youth        | 5,342          | Self-report      | 2007 National Survey of Children's Health (NSCH)                                              | sports participation                                                     |
| Nye 2019     | Cross sectional | collegiate & university athletic trainers | 1077           | Self-report      | n/a                                                                                           | Perceptions of care for LGBTQ student-athletes                           |
| Okamoto 2013 | Cross sectional | US high school students                   | 14,139         | Self-report      | National Longitudinal Study of Adolescent Health (Add Health)                                 | extracurricular (i.e. sport) participation                               |
| Olson 2021   | Cohort          | pediatric patients with meniscus injury   | 49             | Insurance Status | Electronic Medical Record                                                                     | Access to care and treatment delays                                      |
| Patel 2021   | Cross sectional | Youth with tibial spine fractures         | 434            | Insurance Status | Electronic Medical Record                                                                     | MRI imaging, time to surgery, post-operative care                        |
| Pharr 2020   | Cross sectional | adult women                               | 164,948        | Self-report      | 2017 Behavioral Risk Factor Surveillance System (BRFSS)                                       | Sport participation                                                      |
| Pike 2017    | Qualitative     | NCAA D1 female athletic trainers          | 15             | Self-report      | n/a                                                                                           | factors influencing obtaining job caring for male sport teams            |
| Post 2019 A  | Cross sectional | California High Schools                   | 1270 (schools) | Self-report      | 2017–2018 California Interscholastic Federation (CIF) Participation Census                    | Athletic Training employment                                             |
| Post 2019 B  | Cross sectional | High school athletic directors            | 402 (schools)  | Self-report      | Median household Income & %Free lunches taken from Wisconsin Department of Public Instruction | access to Athletic training services                                     |

|                  |                                        |                                                         |               |                                              |                                                                                                                                       |                                                                      |
|------------------|----------------------------------------|---------------------------------------------------------|---------------|----------------------------------------------|---------------------------------------------------------------------------------------------------------------------------------------|----------------------------------------------------------------------|
| Ramey 2020       | Cross sectional study                  | adult athletes                                          | 125           | Self-report                                  | Short-Form Patient Satisfaction Questionnaire (PSQ-18)                                                                                | health care access and satisfaction scores                           |
| Ramkumar 2019    | Cohort                                 | patients undergoing unilateral primary or revision ACLR | 3202          | Self-report                                  | n/a                                                                                                                                   | loss to follow-up                                                    |
| Roberts 2020     | Cross sectional                        | Former professional football players                    | 3747          | Self-report                                  | Pro Football Reference (PFR) data set                                                                                                 | Physical and mental health                                           |
| Rogers 2018      | Cross sectional                        | Physical therapy locations                              | 139           | Census Data (% households living in poverty) | 2015 US Census data                                                                                                                   | Access to PT; Time to Initial Appointment                            |
| Ross 2020        | Cross sectional                        | children and adolescents age 6-17                       | 49518         | DSQ (Disability Standard Question)           | 2016–2017 National Survey of Children’s Health (NSCH)                                                                                 | sport participation                                                  |
| Ross 2021        | Cross sectional                        | children and adolescents aged 6-17 years                | 33,093        | DSQ (Disability Standard Question)           | 2016–2017 National Survey of Children’s Health (NSCH)                                                                                 | sport participation                                                  |
| Saint Onge 2011  | Cross sectional                        | Nationally representative sample of adults              | 17,455        | Self-report                                  | 1998 National Health Interview Survey–Sample Adult Prevention Module (NHIS-SAPM)                                                      | Team sport or facility based sport (e.g. golf, tennis) participation |
| SayedAhmed 2018  | Qualitative                            | children with limb absence                              | 11            | Self-report                                  | The International Classification of Functioning, Disability, and Health                                                               | sport participation                                                  |
| Schinke 2010     | Qualitative                            | Canadian aboriginal youth                               | n/a           | Self-report                                  | n/a                                                                                                                                   | sport participation                                                  |
| Schober 2015     | Community-based participatory research | Community based youth soccer programs                   | n/a           | Self-report                                  | Centers for Disease Control and Prevention’s (CDC) Youth Risk Behavioral Surveillance System (one question); US Census (one question) | satisfaction and participation in community-based soccer program     |
| Shi 2020         | Cross sectional                        | orthopedic practices                                    | 194 (clinics) | Insurance Status                             | n/a                                                                                                                                   | access to care                                                       |
| Shirazipour 2015 | Qualitative                            | parents of youth with mobility impairments              | 20            | Self-report                                  | Health Action Process Approach (HAPA)                                                                                                 | Parental support behaviors for                                       |

|              |                 |                                                                                    |                                  |             |                                                                                                                                                                          |                                                                                           |
|--------------|-----------------|------------------------------------------------------------------------------------|----------------------------------|-------------|--------------------------------------------------------------------------------------------------------------------------------------------------------------------------|-------------------------------------------------------------------------------------------|
|              |                 |                                                                                    |                                  |             |                                                                                                                                                                          | sport participation                                                                       |
| Simpson 2005 | Cross sectional | Canadian students grades 6-10                                                      | 7235                             | Self-report | 2001-2002 Health behaviour in school aged children survey (HBSC)                                                                                                         | Sport related injury                                                                      |
| Singh 2008   | Cross sectional | immigrant children                                                                 | 68288                            | Self-report | 2003-2004 National Survey of Children's Health (NSCH)                                                                                                                    | sports participation                                                                      |
| Siple 2018   | Qualitative     | Black women certified athletic trainers                                            | 10                               | Self-report | n/a                                                                                                                                                                      | barriers and facilitators of retention and credentialing of black women athletic trainers |
| Sirard 2006  | Cross sectional | Middle school students                                                             | 1692                             | Self-report | modified Participation Motivation Questionnaire (mod-PMQ); Youth Risk Behavior Surveillance System (YRBSS)                                                               | sport participation                                                                       |
| Stanish 2015 | Cross sectional | Adolescents with ASD and typically developing                                      | 95                               | Self-report | Interactive Autism Network (IAN) database                                                                                                                                | Sport participation                                                                       |
| Su 2019      | Cross sectional | Pediatric patients receiving treatment for a sports-related musculoskeletal injury | 268 (patients) ; 251 (guardians) | Self-report | n/a                                                                                                                                                                      | health literacy                                                                           |
| Thomas 2019  | Cohort          | First year Canadian college students                                               | 301                              | Self-report | Block Physical Activity Questionnaire (BPAQ); Physical Activity Questionnaire for Adolescents (PAQ-A); Determinants of Physical Activity Behaviors Questionnaire (DPABQ) | sport participation                                                                       |
| Tran 2021    | Cross sectional | collegiate student-athletes                                                        | 39,840                           | Self-report | 2010-2015 American College of Health Association National College Health Assessment (ACHANCHA-II)                                                                        | mental health                                                                             |



|                |                 |                                                                    |                                  |             |                                                                                                                                        |                                                                                  |
|----------------|-----------------|--------------------------------------------------------------------|----------------------------------|-------------|----------------------------------------------------------------------------------------------------------------------------------------|----------------------------------------------------------------------------------|
| Tran 2022      | Cross sectional | Collegiate student athletes                                        | 4089 (weighted)                  | Self-report | 2015-2018 Healthy Minds Study (HMS); Patient Health Questionnaire (PHQ-9)                                                              | mental health psychotherapy utilization                                          |
| Tran 2023      | Cross sectional | Collegiate student-athletes and their peers (non-student athletes) | 502 (study 1); 108,654 (study 2) | Self-report | 2010-2015 American College of Health Association National College Health Assessment (ACHANCHA-II); 2015-2018 Healthy Minds Study (HMS) | perception of mental-health needs                                                |
| Walen 2020     | Cross sectional | collegiate and university athletic trainers                        | 667                              | Self-report | n/a                                                                                                                                    | comfort, confidence and perceptions in working with transgender student-athletes |
| Wallace 2017   | Cross sectional | high school athletes                                               | 715                              | n/a         | n/a                                                                                                                                    | Knowledge of concussion signs and symptoms and reporting behaviors               |
| Wallace 2018 A | Cross sectional | collegiate athletes                                                | 543                              | Self-report | Immediate Post-Concussion Assessment and Cognitive Test (ImPACT)                                                                       | Neurocognitive performance and concussion symptom scores                         |
| Wallace 2018 B | Cross sectional | adolescent athletes                                                | 577                              | Self-report | Centers for Disease Control and Prevention (CDC) Heads Up Education materials                                                          | Concussion knowledge and symptom recognition                                     |
| Wallace 2021 A | Cross sectional | collegiate athletes                                                | 768                              | Self-report | Post-Concussion Symptom Scale (PCSS)                                                                                                   | concussion symptom knowledge                                                     |
| Wallace 2021 B | Cross sectional | high school athletes                                               | 577                              | Self-report | n/a                                                                                                                                    | concussion reporting                                                             |
| Wallace 2022 A | Cross sectional | collegiate athletes                                                | 735                              | Self-report | n/a                                                                                                                                    | Concussion non-disclosure                                                        |

|                 |                 |                                                 |     |                  |                                                                                                        |                                                         |
|-----------------|-----------------|-------------------------------------------------|-----|------------------|--------------------------------------------------------------------------------------------------------|---------------------------------------------------------|
| Wallace 2022 B  | Cross sectional | adolescent athletes diagnosed with SRC          | 582 | Self-report      | Vanderbilt Sports Concussion Center (VSCC) registry                                                    | Care pathway for sports related concussion              |
| Wallace 2023    | Cohort          | concussed collegiate athletes                   | 235 | Self-report      | Immediate Post-Concussion Assessment and Cognitive Test (ImPACT); Post Concussion Symptom Scale (PCSS) | neurocognitive test performance                         |
| West 2019       | Qualitative     | older female softball players                   | 64  | Self-report      | n/a                                                                                                    | sport participation                                     |
| Wilkerson 2020  | Qualitative     | Black Division I football student-athletes      | 9   | Self-report      | n/a                                                                                                    | barriers to seeking mental health treatment             |
| Williams 2017   | Cross sectional | adolescents with an ACL or meniscal tear        | 119 | Insurance Status | Current Procedural Terminology (CPT) codes; International Knee Documentation Committee (IKDC) scores   | time to presentation for injury                         |
| Wiznia 2017     | Cohort          | orthopaedic surgery sports medicine specialists | n/a | Insurance Status | Medicaid Reimbursement rates from Current Procedural Terminology (CPT) code 29882                      | access to specialty care                                |
| Yengo-Kahn 2021 | Cross sectional | athletes who had been treated for SRC           | 247 | Self-report      | Vanderbilt Sports Concussion Center (VSCC) registry                                                    | Recovery and experiences after sport related concussion |

**Table S6 Location, Aim, Setting and Conclusion of Included Studies**

| Study ID         | Country       | Study Aim                                                                                                                                   | Study Setting                                                  | Study Conclusion                                                                                                                                                                                                                                                                |
|------------------|---------------|---------------------------------------------------------------------------------------------------------------------------------------------|----------------------------------------------------------------|---------------------------------------------------------------------------------------------------------------------------------------------------------------------------------------------------------------------------------------------------------------------------------|
| Allahabadi 2022  | United States | Assess association between insurance status and delays in care for pediatric patients with patellar instability surgery                     | Clinic                                                         | Significant delay in care was associated with individuals with public insurance                                                                                                                                                                                                 |
| Attia 2021       | United States | Assess female representation in national orthopedic society membership                                                                      | professional orthopedic society directors                      | Despite growing numbers, females continue to be underrepresented in society membership; committee participation; leadership positions; at annual meetings; and in receipt of grants, fellowships, and scholarships                                                              |
| Austin 2022      | United States | Assess racial disparities in sudden cardiac death in basketball players                                                                     | Club; Community; High School/ Middle School                    | Survival was lower in black and other race compared with whites; Survival was higher in school sponsored events compared with club or community.                                                                                                                                |
| Ballesteros 2020 | United States | Investigate racial-ethnic minority student-athletes' mental health need, mental health use, and factors that influence mental health usage. | College/University                                             | Mental health services were underutilized by racial-ethnic minority student-athletes                                                                                                                                                                                            |
| Baraga 2012      | United States | Examine access to care on the basis of insurance type for ACL injuries in South Florida                                                     | Clinic                                                         | Insurance type influenced time to diagnosis and time care for ACL tears.                                                                                                                                                                                                        |
| Barfield 2013    | United States | To determine factors influencing exercise in power wheelchair soccer players                                                                | National competition                                           | Physical exertion and access to facilities were the primary barriers to exercise.                                                                                                                                                                                               |
| Baria 2015       | United States | To determine if wrestling is a safe, positive athletic option for limb-deficient individuals.                                               | Online survey sent from National Wrestling Coaches Association | Wrestling is a safe, positive sport for limb-deficient individuals; It fosters competitive equality between impaired and non-impaired participants, and it has a positive impact on health and quality-of-life.                                                                 |
| Barter 2023      | United States | Identify differences in access to athletic training services in public secondary school based on school socio-economic status               | Database of high schools                                       | Socio-economic status disparities were present in access to athletic training services in public secondary schools.                                                                                                                                                             |
| Beck 2020        | United States | Assess how insurance type impacted access to knee MRI in pediatric sports medicine patients                                                 | Clinic                                                         | Pediatric patients with public insurance had delays in ordering, completion, and follow-up of knee MRI studies in comparison to those with commercial plans.                                                                                                                    |
| Bopp 2017        | United States | To examine the determinants of sport participation, as it relates to race, socialization and perceived welcomeness.                         | College/University                                             | Racially diverse sport participants may perceive to be unwelcome in certain sports due in part to stereotypes and other culturally based considerations.                                                                                                                        |
| Bram 2020        | United States | To assess outcomes of care for ACL injuries in a pediatric population at a large, academic institution based on race and insurance status.  | Clinic                                                         | After ACL rupture, black/Hispanic children and publicly insured children experience a greater delay to surgery. Black/Hispanic patients have more irreparable meniscus tears and less PT visits and greater residual hamstrings and quadriceps weakness 9 months after surgery. |

|                   |               |                                                                                                                                                                                                                                                                  |                                                                 |                                                                                                                                                                                                                                                                                                                                                                                                                                                                                             |
|-------------------|---------------|------------------------------------------------------------------------------------------------------------------------------------------------------------------------------------------------------------------------------------------------------------------|-----------------------------------------------------------------|---------------------------------------------------------------------------------------------------------------------------------------------------------------------------------------------------------------------------------------------------------------------------------------------------------------------------------------------------------------------------------------------------------------------------------------------------------------------------------------------|
| Braza 2018        | United States | Initiate community and academic partnerships in adaptive sports and recreation and understand local opportunities and how they are used by individuals with disabilities.                                                                                        | Community                                                       | Preliminary data emphasize the need to engage individuals with disabilities regarding participation in adaptive sports. Additionally, the study identified a need to increase engagement among individuals of color.                                                                                                                                                                                                                                                                        |
| Brown 2018        | United States | Assess female, black triathletes' reasons for being involved in physical activity as well as barriers and motivations.                                                                                                                                           | Club                                                            | Four culturally based themes were identified: (1) improving body composition to become leaner, physical attractiveness, triathlete family and camaraderie.                                                                                                                                                                                                                                                                                                                                  |
| Brown 2021        | United States | Assess food insecurity in NCAA DIII student-athletes                                                                                                                                                                                                             | College/University                                              | Food insecurity was higher among Black (31%) and Hispanic students (18.3%) compared with White (13.3%) students                                                                                                                                                                                                                                                                                                                                                                             |
| Brown 2022        | United States | Assess whether differences exist between African American and non-Hispanic White patients evaluated for hip disabilities.                                                                                                                                        | Clinic;<br>College/University                                   | Race-based differences in patients evaluated by a hip arthroscopy specialist were identified – the number of evaluations were lower among African Americans and they had a lower proportion of MRIs; No differences were noted in surgery recommendations.                                                                                                                                                                                                                                  |
| Budavari 2021     | United States | Examine disparities in extracurricular participation among adolescents with Autism Spectrum Disorder (ASD)                                                                                                                                                       | national survey<br>database<br>identified subject<br>caregivers | Among adolescents with ASD, participation in extracurricular and community activities (i.e. sport) involvement is lower among specific groups, based on sex, household income, and caregiver education.                                                                                                                                                                                                                                                                                     |
| Calzo 2014        | United States | Examine adolescent and young adult team sports participation by sexual orientation and assess contributions of gender nonconformity and low athletic self-esteem to possible sexual orientation differences.                                                     | national survey                                                 | Sexual minority adolescents were 46-76% less likely to participate in team sports than same-gender heterosexuals. Gender nonconformity and athletic self-esteem played a role in differences.                                                                                                                                                                                                                                                                                               |
| Cohen 2007        | United States | Identify the number of extracurricular sports offered, who is participating, and assess how participation is related to high-risk behaviors.                                                                                                                     | High School                                                     | The average school offered 14 sport programs with 39% of boys and 30% of girls participating. Smaller schools and schools with more disadvantaged students offered fewer sports.                                                                                                                                                                                                                                                                                                            |
| Copley 2020       | United States | Assess disparities in subspecialty concussion care related to ethnicity, limited English proficiency, and insurance status.                                                                                                                                      | Clinic                                                          | Youth seen at a tertiary care clinic for concussion were less likely to be Hispanic than youth who were seen with fracture. Youth with concussion were more likely to have private insurance compared to youth with fracture and greater odds of not using an interpreter. Disparities in subspecialty concussion care exist for Hispanic youth, those with limited English proficiency and non-private insurance.                                                                          |
| Côté-Leclerc 2017 | Canada        | Compare the quality of life of adults with mobility limitations playing a wheelchair adapted sport to those reporting no mobility limitations, and explore the influence of playing an adapted sport on the quality of life of adults with mobility limitations. | Community                                                       | People with mobility limitations playing adapted sports and people without limitations have a similar quality of life. Participation in adapted sports had a positive effects on self-esteem, self-efficacy, sense of belonging, participation in meaningful activities, society's attitude towards people with mobility limitations, and physical well-being. However, participants stated that this involvement, especially at higher levels, had a negative impact on their social life. |

|               |               |                                                                                                                                                                                                              |                                               |                                                                                                                                                                                                                                                                                                                                                                                                                                                                               |
|---------------|---------------|--------------------------------------------------------------------------------------------------------------------------------------------------------------------------------------------------------------|-----------------------------------------------|-------------------------------------------------------------------------------------------------------------------------------------------------------------------------------------------------------------------------------------------------------------------------------------------------------------------------------------------------------------------------------------------------------------------------------------------------------------------------------|
| Couch 2023    | United States | To elucidate US African American female Olympians' lived experiences of selected identity components (i.e., race, gender, athletic identity) as they navigated transitions during their competitive careers. | Community                                     | Participants indicated that each level of track experience had significant implications on their racialized and gendered athletic identity as well as on their performance. Though the intersections of race, gender, and athlete identities in sport were experienced differently among these athletes.                                                                                                                                                                      |
| Crissey 2006  | United States | Examine the relationship between sport participation and perceptions of body size and weight-loss strategies among adolescent girls.                                                                         | High School, middle school and in-home visits | Girls participating in stereotypically feminine sports are more likely to report feeling overweight, attempt to lose weight and use multiple weight loss strategies compared with non-athletes. Associations for weight loss are generally weaker for non-white girls. This association was not found for traditionally masculine sports.                                                                                                                                     |
| Day 2021      | United States | Assess differences in racial and ethnic frequencies across division, calendar year and gender for athletic trainers in the NCAA                                                                              | College/University                            | BIPOC athletic trainers represent a small part of the profession currently working in the NCAA. A majority of NCAA athletic trainers and assistant athletic trainers were categorized as white and male.                                                                                                                                                                                                                                                                      |
| Deaner 2012   | United States | Assess whether organized school sport participation underestimates sex differences in sport participation.                                                                                                   | College/University; Community                 | Males have a greater predisposition to sport than females which may contribute to participation differences.                                                                                                                                                                                                                                                                                                                                                                  |
| Donohue 2022  | United States | Adapt evidence-based cognitive behavior therapies with sport participation with a goal of reducing the healthcare disparities in youth from ethnic/racial minority and low income neighborhoods.             | Workshops                                     | The proposed intervention showed promise for optimizing mental health and sport performance for youth from ethnic/racial minority and low-income neighborhoods.                                                                                                                                                                                                                                                                                                               |
| Drake 2015    | United States | Evaluate the characteristics of high school athletic programs and determine the extent to which these characteristics influenced boy's and girls' sports team participation.                                 | Telephone surveys                             | High School sport opportunities differentially affect boys and girls sports participation. The variety of choice of sports offered predicted girls' sports participation whereas the percent of unrestricted sports (access) predicted boys' participations.                                                                                                                                                                                                                  |
| Eberman 2021  | United States | To gain more in-depth information about athletic trainer knowledge and experiences regarding the health care needs of transgender student-athletes.                                                          | College/University                            | Athletic trainers identified 4 areas of concern with care - perceived deficiencies (inadequate care, lack of awareness of regulations, not competent in counseling), misconceptions (unable to accurately articulate definitions of transgender, transitioning, effects of hormone replacement therapy), concerns (transgender athlete mental health, self-image, cost of transition care) and creating safety (more inclusive environment, creating trusting relationships). |
| Foley 2014    | United States | Compare the BMI of children and youth with and without intellectual disabilities and assess the influence of age and gender on obesity in children with intellectual disabilities.                           | Community                                     | An obesity disparity exists for children and youth with intellectual disabilities, particularly as they get older.                                                                                                                                                                                                                                                                                                                                                            |
| Greenley 2018 | United States | Examine the role of inflammatory bowel disease (IBD) in youth sport participation.                                                                                                                           | Registry                                      | Two-thirds of participants felt IBD impaired their sports participation - the most salient correlates of impairment were fatigue, pain and past IBD-related surgery.                                                                                                                                                                                                                                                                                                          |

|                 |               |                                                                                                                                                                                                                                                                                                                   |                   |                                                                                                                                                                                                                                                                                                                                                                                                                                                                                                         |
|-----------------|---------------|-------------------------------------------------------------------------------------------------------------------------------------------------------------------------------------------------------------------------------------------------------------------------------------------------------------------|-------------------|---------------------------------------------------------------------------------------------------------------------------------------------------------------------------------------------------------------------------------------------------------------------------------------------------------------------------------------------------------------------------------------------------------------------------------------------------------------------------------------------------------|
| Hannon 2006     | United States | Identify ways in which local stakeholders can work academic partners to improve opportunities for youth physical activity using censuses of facilities and programs.                                                                                                                                              | Community         | Compared with the three suburban comparison communities, Boston overall had the lowest ratio of participants to youths (1.02), and Boston's median income was closest to the median income of the low-income comparison community. The high-income community had the greatest ratio of participants to youths (2.00). Lower participation rates among girls than boys in each community indicated a consistent sex disparity.                                                                           |
| Harrington 2017 | Canada        | Understand parents' perceived barriers to accessing sports and recreation facilities                                                                                                                                                                                                                              | Community         | Parents faced access issues and there was considerable variation in access between communities. Parents living in different types of communities (e.g., rural, more deprived) were found to face barriers more often than others, and face different types of barriers.                                                                                                                                                                                                                                 |
| Heinze 2018     | United States | Improve understanding of why and how school districts eliminate pay-to-play for sports                                                                                                                                                                                                                            | School districts  | In districts with strong local identities, histories and traditions; school boards look within the community, rather than to the institutional environment, when making decisions. Culture and social relationships may have a stronger influence on board decision-making than systematic data collection and analysis.                                                                                                                                                                                |
| Holmes 2016     | United States | Characterize cognitive related symptoms in sport related concussion and examine relationship with race, ethnicity, age, insurance, and sex in a pediatric population                                                                                                                                              | Clinic            | Although boys sustained more concussions, girls were more likely to present with cognitive related symptoms. Black/African American children were more likely to suffer cognitive related symptoms than white children.                                                                                                                                                                                                                                                                                 |
| Hyde 2020       | United States | Examine the difference in prevalence of US youth sport participation by age group and selected demographic conditions                                                                                                                                                                                             | Community         | Participation in youth sport is highest among youth age 10-13, males, and white non-Hispanic youth. Participation also increased with increasing parent/caregiver education and household income.                                                                                                                                                                                                                                                                                                       |
| Iverson 2021    | United States | Gain understanding of the resources, barriers, and facilitators of participation in adaptive sport and recreational activities as a means of achieving physical activity recommendations in individuals with disability and understand preferences for a patient navigator service to help mitigate the barriers. | Community         | Adaptive sport should be designed to offer people with disabilities opportunities to build social networks and strengthen social support. A patient navigator service could help increase participation in adaptive sport within the community.                                                                                                                                                                                                                                                         |
| Johnson 2022    | United States | Examine the association between metropolitan statistical area (MSA) status and sports participation among American youth.                                                                                                                                                                                         | Community         | The relationship between MSA status and sports participation may be largely driven by factors that affect youth's ability to participate in sports. Sports participation was higher among females versus males overall. In the models adjusted for demographics, non-MSA youth ages 12-17 were more likely to participate, particularly males. Efforts promoting youth sports should consider differences in socio-demographic factors between MSA versus non-MSA areas to help increase participation. |
| Johnston 2019   | United States | Examine girls' experiences in one after-school positive youth development program called REACH (Reflective                                                                                                                                                                                                        | Elementary school | Girls' experiences shape relational dimensions of the positive youth development model, particularly through sport and should be                                                                                                                                                                                                                                                                                                                                                                        |

|                |               |                                                                                                                                                                                                                                                                                                                                              |                   |                                                                                                                                                                                                                                                                                                                                                          |
|----------------|---------------|----------------------------------------------------------------------------------------------------------------------------------------------------------------------------------------------------------------------------------------------------------------------------------------------------------------------------------------------|-------------------|----------------------------------------------------------------------------------------------------------------------------------------------------------------------------------------------------------------------------------------------------------------------------------------------------------------------------------------------------------|
|                |               | Educational Approach to Character and Health)                                                                                                                                                                                                                                                                                                |                   | considered when developing these programs.                                                                                                                                                                                                                                                                                                               |
| Kellstedt 2021 | United States | Examine the influence of grade, sex, and family income on youth sport participation and youth sport participation on moderate-to-vigorous physical activity of children in rural communities.                                                                                                                                                | Elementary school | While a fairly high percentage of children participate in youth sports, there are disparities in rural communities on youth sport participation and physical activity outcomes based on age, sex, and family income.                                                                                                                                     |
| Kopka 2021     | Canada        | Determine whether sex or age influence whether COVID-19-related health care closures affect the health, recovery, and access to resources of preoperative and postoperative orthopedic sports medicine patients.                                                                                                                             | Clinic            | Significant sex- and age-specific differences in health and recovery among orthopedic sport medicine patients as a result of the COVID-19 health care closures were identified. Females reported significantly more pain, anxiety, and delay in their rehabilitation, while younger patients reported greater negative impacts and worse overall health. |
| Kroshus 2017   | United States | Assess whether teams at schools with an athletic trainer on staff had a higher number of diagnosed concussions than teams without medical personnel present and assess whether the variability in employment of a certified Athletic trainer by Washington state high schools is patterned by socioeconomic and demographic characteristics. | High School       | Football and boys soccer teams at schools with an athletic trainer had a significantly greater number of athletes with diagnosed concussions. Schools with an athletic trainer were more likely to be in an urban location, to have an enrollment of 1000 students or more, and to have a smaller proportion of students eligible for school lunch.      |
| Kroshus 2019 A | United States | Assess whether flag football would be more accessible in communities characterized by higher socioeconomic status residents                                                                                                                                                                                                                  | Community         | Youth in communities characterized by less educational attainment have less access to flag football.                                                                                                                                                                                                                                                     |
| Kroshus 2019 B | United States | Quantify the extent to which preseason information sheets requiring a parent signature are translated into Spanish; describe Spanish-language concussion information on the websites of US public high school athletic associations, leading youth sport organizations and leading US children's hospitals.                                  | Websites          | Only 25% of websites examined contained concussion information in Spanish and none offered mirrored Spanish translation. The readability of concussion information in both English and Spanish was higher than recommended guidelines. Non-English speaking parents may be inadequately informed about concussion guidelines                             |
| Kurc 2009      | Canada        | Identify association between social support, participation in intramurals, varsity and community sports with physical activity in Ontario high school students, and assess gender differences in the prevalence of physical activity and participation in school- and community-based sports.                                                | High School       | Males and females were more likely to be active if they participated in intramural activities, varsity sports or community sports. Students with low social support for physical activity are less likely to be active.                                                                                                                                  |
| Lape 2018      | United States | Identify novel factors that influence participation in a community-based adaptive sports program                                                                                                                                                                                                                                             | Community         | Participants felt participation was beneficial for physical well-being and transformative in terms of how they viewed themselves. Focus group participants reported that involvement in an adaptive sports program provided physical, social, and attitudinal benefits. Yet, these athletes often had to expend limited personal resources to            |

|                 |                                          |                                                                                                                                                                                                                                                                                                             |                            |                                                                                                                                                                                                                                                                                                                      |
|-----------------|------------------------------------------|-------------------------------------------------------------------------------------------------------------------------------------------------------------------------------------------------------------------------------------------------------------------------------------------------------------|----------------------------|----------------------------------------------------------------------------------------------------------------------------------------------------------------------------------------------------------------------------------------------------------------------------------------------------------------------|
|                 |                                          |                                                                                                                                                                                                                                                                                                             |                            | access programs.                                                                                                                                                                                                                                                                                                     |
| Lawler 2012     | United States                            | Determine if mortality and survival in basketball players is related to race                                                                                                                                                                                                                                | NBA                        | White, retired NBA basketball players outlive their African-American counterparts by 1.5 years. Both African-American and white retired NBA players outlive their non-NBA male counterparts from the general population.                                                                                             |
| Lawrence 2017   | Canada, US, Great Britain, and Australia | Document the distribution of sociodemographic markers (race and relative access to wealth) in athletes participating at the summer and Winter Olympic Games.                                                                                                                                                | Olympic athlete registries | Racial and socio-economic biases were identified in both summer and winter Olympic sports; predominantly favoring white and privately educated Olympic athletes.                                                                                                                                                     |
| Lemez 2018      | US, Canada, and UK                       | Critically examine the mortality outcomes of deceased National Basketball Association and American Basketball Association players                                                                                                                                                                           | Online                     | Deceased NBA/ABA players had similar causes of death to the general population, yet questions remain.                                                                                                                                                                                                                |
| Long 2017       | United States                            | To investigate the availability of athletic training services to North Carolina High School Athletic Association member student-athletes and assess whether the county's economic health or the percentage of low-income students was a predictor of the presence of a full-time licensed athletic trainer. | High School                | Economically healthy counties are more likely to use licensed athletic trainers in HS athletics, but federal Title I school designation did not predict usage of an athletic trainer.                                                                                                                                |
| Marquis 2015    | United States                            | Assess for differences in sports participation between young children with developmental delay and typically developing children, and identify variables that are associated with sport participation.                                                                                                      | Community                  | Typically developing children participated in a higher number of sports and had higher relational sport scores at ages 6 & 8, as well as having a greater number of consistent sports.                                                                                                                               |
| Mason 2019      | Canada                                   | Identify barriers to sports participation among Canadian Indigenous youth                                                                                                                                                                                                                                   | Community                  | identified barriers include (1) socio-economic status, access to resources and underserved communities; (2) experiences of racism and discrimination; (3) perceived self-confidence and sense of belonging and (4) kinship and supportive networks                                                                   |
| Matar 2021      | United States                            | Evaluate the impact of insurance type on obtaining an appointment in an outpatient orthopedic clinic and determine association with waiting periods, population metrics and access to care.                                                                                                                 | Clinic                     | Patients with Medicaid are less likely to receive orthopedic care for multiple sports medicine injuries, are more likely to encounter barriers and endure longer waiting periods. Medicaid patients were more readily scheduled in rural communities, whereas private patients were accepted at all community types. |
| McGuine 2021    | United States                            | Describe the health of athletes during COVID-19 related school closures and sport cancellations.                                                                                                                                                                                                            | High School                | Females reported higher prevalence of moderate or severe anxiety symptoms compared to males; Quality of life was lowest (worst) for athletes with the highest poverty levels                                                                                                                                         |
| McLoughlin 2017 | United States                            | Identify motivations, facilitators, and barriers to sports participation of elite athletes with a physical disability.                                                                                                                                                                                      | Community                  | Facilitators to athletes' experiences include competition, achieving goals, social support and coaches. Barriers include time constraints,                                                                                                                                                                           |



|               |               |                                                                                                                                                                                                                       |                               |                                                                                                                                                                                                                                                                                                                                                                                                                                                                                                                                                                       |
|---------------|---------------|-----------------------------------------------------------------------------------------------------------------------------------------------------------------------------------------------------------------------|-------------------------------|-----------------------------------------------------------------------------------------------------------------------------------------------------------------------------------------------------------------------------------------------------------------------------------------------------------------------------------------------------------------------------------------------------------------------------------------------------------------------------------------------------------------------------------------------------------------------|
|               |               |                                                                                                                                                                                                                       |                               | cost, lack of awareness and overuse injuries.                                                                                                                                                                                                                                                                                                                                                                                                                                                                                                                         |
| McMillan 2016 | Canada        | Determine whether non-traditional family structure and physical custody arrangements are associated with organized sport participation in youth, and if so whether this relationship is mediated by SES.              | High School;<br>Middle school | youth living in both single-parent and reconstituted families experienced significant disparities in organized sport participation that was partially mediated by perceived family wealth                                                                                                                                                                                                                                                                                                                                                                             |
| Mereish 2015  | United States | to evaluate the physical activity and sports participation of sexual minority adolescents; to determine if there is an association between the physical activity and the weight status of sexual minority adolescents | High School                   | Sexual minority females were less likely to participate in team sports and more likely to be overweight than heterosexual females. Sexual minority males were less likely to be physically active or to participate in team sports than heterosexual males, but they did not differ in risk for obesity                                                                                                                                                                                                                                                               |
| Moore 2021    | United States | To determine the objective characteristics of fellowship directors in orthopaedic sports medicine                                                                                                                     | website                       | Orthopaedic sports medicine fellowship directors of accredited sports medicine fellowship programs in the US have a level of research productivity, tend to come from a handful of orthopaedic residency and sports medicine fellowship programs and are primarily white male.                                                                                                                                                                                                                                                                                        |
| Munson 2021   | United States | To describe common experiences transgender athletes have had with ATs and to identify barriers transgender athletes may encounter when seeking care                                                                   | College/University            | Athletic trainers can improve their care of transgender patients by (1) including education about transgender people in professional athletic training curriculums, (2) seeking continuing education on trans-gender topics, (3) promoting the values of receptiveness and open mindedness, (4) using gender-inclusive language, (5) visually signaling that athletic training facilities are safe for all people, (6) understanding the importance of a transgender patient's privacy, and (7) being aware of local resources for transgender patients and athletes. |
| Naar 2017     | United States | Identify the factors that influence older women's participation in competitive softball teams                                                                                                                         | Community                     | Barriers to participation include issues with recruitment, access to resources, and breaking age-related cultural stereotypes                                                                                                                                                                                                                                                                                                                                                                                                                                         |
| Ness 2012     | United States | To increase the understanding of risk factors for childhood overweight and obesity among American Indian/Alaska Native communities, which can then be used to develop effective prevention and treatment strategies   | Community                     | Lack of sports team participation was significantly associated with overweight/obesity only among American Indian and Alaska Native children.                                                                                                                                                                                                                                                                                                                                                                                                                         |
| Nye 2019      | United States | Explore perceptions of ATs treating LGBTQ+ student-athlete patients                                                                                                                                                   | College/University            | Approach, quality of care and comfort differed by AT sexual orientation, gender, religion and interpersonal contact with LGBTQ friends/family. ATs wanted more training and education on the specific needs of this population                                                                                                                                                                                                                                                                                                                                        |
| Okamoto 2013  | United States | To assess patterns of participation in sports for immigrant and racial groups                                                                                                                                         | High School;<br>Middle school | Most youth have higher probabilities of sports in high-SES schools, but participation is contingent on the presence of minority and immigrant students                                                                                                                                                                                                                                                                                                                                                                                                                |

|               |               |                                                                                                                                                                                                                                          |                    |                                                                                                                                                                                                                                                                                                                                                                                                                                                                                                                                    |
|---------------|---------------|------------------------------------------------------------------------------------------------------------------------------------------------------------------------------------------------------------------------------------------|--------------------|------------------------------------------------------------------------------------------------------------------------------------------------------------------------------------------------------------------------------------------------------------------------------------------------------------------------------------------------------------------------------------------------------------------------------------------------------------------------------------------------------------------------------------|
| Olson 2021    | United States | To investigate the impact of insurance status on access to care and severity of meniscal injury in the pediatric population.                                                                                                             | Clinic             | Patients with public insurance and meniscus injury experience significant delays in care at several time points (time to initial evaluation, time to MRI, overall time from initial evaluation to surgery) compared to privately insured patients with the same injury. Despite these delays there was no increase in severity of meniscus injuries in the public insurance cohort.                                                                                                                                                |
| Patel 2021    | United States | To assess the effect of insurance status on the evaluation and treatment of tibial spine fractures in adolescents                                                                                                                        | Clinic             | Children with public insurance and a tibial spine fracture were more likely to experience delays with MRI and surgical treatment than those with private insurance. Additionally, patients with public insurance were more likely to undergo postoperative casting rather than bracing.                                                                                                                                                                                                                                            |
| Pharr 2020    | United States | Examine sociodemographic determinants among subcategories of physically active women in the US                                                                                                                                           | Community          | Women who participated in sport were more likely to be in the younger age groups, were more diverse, likely to be employed, and college graduates.                                                                                                                                                                                                                                                                                                                                                                                 |
| Pike 2017     | United States | Investigate the experiences of female ATs when seeking employment with male sport teams within DI settings                                                                                                                               | College/University | Female ATs believed job access was not an issue - familiarity with the university and staff as well as career goals helped them obtain their positions. Desire to work in male sport was not a primary contributor to their decision making process.                                                                                                                                                                                                                                                                               |
| Post 2019 A   | United States | To describe the availability of ATs certified by the Board of Certification in California secondary schools and to examine potential factors influencing access to AT services in California secondary schools.                          | High School        | More than half (55%) of schools did not employ ATs (48%) or employed unqualified health personnel (UHP) in an AT role. Nearly 30% of student-athletes in California participated in athletics at a school that did not employ ATs and 8% of student-athletes participated at a school that employed UHP in the role of AT. Schools that reported employing ATs had a lower proportion of students eligible for free or reduced-price lunch than schools that did not employ ATs and schools that employed UHP (both $p < 0.001$ ). |
| Post 2019 B   | United States | To determine if (1) access to Athletic training services or (2) the level of access (Athletic training hours per week and athletes per Athletic training hour) differed based on the socioeconomic characteristics of secondary schools. | High School        | Nearly 95% of Wisconsin secondary schools had an athletic trainer on site. The schools who did not have access to an athletic trainer were in the lower third median household income and in the upper third of students who qualified for free lunch.                                                                                                                                                                                                                                                                             |
| Ramey 2020    | United States | To identify differences in healthcare access, satisfaction, and unmet needs between recreational adaptive and able-bodied athletes in all sports and within a single sport (hockey).                                                     | Community          | No differences were seen between groups in healthcare access or satisfaction scores. Adaptive athletes of the same sport reported a higher rate of unmet sports-related healthcare needs but with few doctor's visits in the preceding year, suggesting discrepancies in expectations and healthcare-seeking behavior                                                                                                                                                                                                              |
| Ramkumar 2019 | United States | To identify independent risk factors associated with failure to complete (ie, loss to follow-up) patient-reported outcome measures (PROMs) at 2 years after                                                                              | Clinic             | Patient sex and race were predictors of 2-year loss to follow-up of PROMs (Males more likely to be lost to follow-up as well as Black and non-white race).                                                                                                                                                                                                                                                                                                                                                                         |

|                 |               |                                                                                                                                                                                                                                                                                |             |                                                                                                                                                                                                                                                                                                                                                                                                                                                                                    |
|-----------------|---------------|--------------------------------------------------------------------------------------------------------------------------------------------------------------------------------------------------------------------------------------------------------------------------------|-------------|------------------------------------------------------------------------------------------------------------------------------------------------------------------------------------------------------------------------------------------------------------------------------------------------------------------------------------------------------------------------------------------------------------------------------------------------------------------------------------|
|                 |               | ACLR in a prospective longitudinal cohort.                                                                                                                                                                                                                                     |             |                                                                                                                                                                                                                                                                                                                                                                                                                                                                                    |
| Roberts 2020    | United States | To examine the association of race with health outcomes (e.g., physical and cognitive function, pain, depression, and anxiety) in former American football athletes.                                                                                                           | Community   | Black players had increased risk of adverse health outcomes versus white players. Native Hawaiians and men of other races had greater risk of all health outcomes except impaired physical functioning, compared with white players. No clear patterns were observed by era of play.                                                                                                                                                                                               |
| Rogers 2018     | United States | To determine access to PT services for privately insured patients versus those with Medicaid who underwent anterior cruciate ligament (ACL) reconstruction.                                                                                                                    | Community   | 43% fewer PT clinics accept Medicaid as compared with private insurance for post-op ACLR rehabilitation. Medicaid patients waited significantly longer for an initial appointment. Access to PT care is still limited despite the expansion of Medicaid insurance coverage to all patients in the state.                                                                                                                                                                           |
| Ross 2020       | United States | To estimate the population-level PA disparities experienced (including sport participation) and the association between disability status and PA engagement.                                                                                                                   | Community   | Children and adolescents with disabilities were significantly less likely to participate in sports compared with peers                                                                                                                                                                                                                                                                                                                                                             |
| Ross 2021       | United States | Identify the relative importance of disability status in predicting participation in sports                                                                                                                                                                                    | Community   | Disability status was a second-level predictor for sport participation. Household education level was the primary predictor followed by activity limitations, household income, and having a neighborhood park. Highest level of participation among disabled children/adolescents was in females from higher education households. Disabled males from households with less than or equal to a high school education were least likely to participate in sports teams or lessons. |
| Saint Onge 2011 | United States | To (1) assess relationship between education and participation in different types of exercise, (2) examine exercise differences among Whites, Blacks and Mexican Americans, (3) Examine whether racial-ethnic differences in exercise close or widen with increasing education | Survey      | Whites were more likely to participate in sports that require facility-based exercise, while Blacks gravitated toward team sports and fitness activities. Mexican Americans gravitated toward team sports.                                                                                                                                                                                                                                                                         |
| SayedAhmed 2018 | Canada        | To identify the perceived factors impacting participation in sports according to children with limb absence and their parents.                                                                                                                                                 | Clinic      | Six themes having an influence on sport participation were identified: (1) functionality of prosthesis, plan in advance, know what I can do (understanding capabilities), stigma and the social environment, love for the sport and the investment involved.<br><br>Children with limb absence present with unique barriers and facilitators in regards to sport participation, thus, what may be a facilitator or barrier for one child may not for another.                      |
| Schinke 2010    | Canada        | To assess the role of family in relation to the sport                                                                                                                                                                                                                          | High School | Family was considered important for youth involvement in                                                                                                                                                                                                                                                                                                                                                                                                                           |

|                  |               |                                                                                                                                                                                         |                            |                                                                                                                                                                                                                                                                                                                                                                                                                                                                                                                                     |
|------------------|---------------|-----------------------------------------------------------------------------------------------------------------------------------------------------------------------------------------|----------------------------|-------------------------------------------------------------------------------------------------------------------------------------------------------------------------------------------------------------------------------------------------------------------------------------------------------------------------------------------------------------------------------------------------------------------------------------------------------------------------------------------------------------------------------------|
|                  |               | engagement of Canadian Aboriginal youth                                                                                                                                                 |                            | Aboriginal community sport programs. Parents were expected to support their children by managing schedules and priorities, providing transportation, financial support, encouragement, and being committed to the child's activity. The family as a whole (including extended family) were seen as sharing the responsibility to retain youth in sport.                                                                                                                                                                             |
| Schober 2015     | United States | To examine the development and implementation of community-based soccer sessions for Latino youth via an academic and community partner                                                 | Community                  | Eight weekly soccer sessions were implemented, attracting Latino youth who were overweight or obese. These soccer sessions were perceived as enjoyable by youth and were appreciated by their parents.                                                                                                                                                                                                                                                                                                                              |
| Shi 2020         | United States | Explore Medicaid patients' access to sports medicine orthopaedic care                                                                                                                   | Clinic                     | Access to care remains a significant burden for the Medicaid population, given a rate of Medicaid refusal of 32.2% across regular-sized orthopedic practices. Time until appointment was significantly longer for Medicaid patients when compared with private insurance.                                                                                                                                                                                                                                                           |
| Shirazipour 2015 | Canada        | To determine the utility of the Health Action Process Approach (HAPA) for understanding parental support for youth with a mobility impairment's (MI) sport participation                | Community                  | The following constructs are important to parental decisions to support sport participation: (1) positive outcome expectations (2) risk perceptions (3) task self-efficacy (4) intentions (5) planning, (6) maintenance self-efficacy and (7) recovery self-efficacy. Differences between groups were noted in these constructs.                                                                                                                                                                                                    |
| Simpson 2005     | Canada        | To determine the contribution of individual and area level measures of socioeconomic status to the occurrence of various injury types among Canadian adolescents.                       | High School; middle school | Higher SES was associated with higher risk for sport/recreational injury                                                                                                                                                                                                                                                                                                                                                                                                                                                            |
| Singh 2008       | United States | Examine prevalence and correlates of physical inactivity and sedentary behavior among immigrant and US born children                                                                    | Community                  | Immigrant children in each ethnic minority group had higher physical inactivity and lower sports participation levels than native children.                                                                                                                                                                                                                                                                                                                                                                                         |
| Siple 2018       | United States | Identify impeding barriers and promoting factors affecting the retention and credentialing of black women ATs                                                                           | Community                  | Impeding barriers include a lack of support, sexism, and racism. Factors that promote include personal characteristics; experience with white culture; faculty, preceptor, and peer support; and the clinical education experience.                                                                                                                                                                                                                                                                                                 |
| Sirard 2006      | United States | Identify, in middle school students, gender-specific sports program participation and attrition factors and the relationship between sports program participation and physical activity | Middle school              | 78% of girls recently participated in sports compared to 83% of boys. 11% of girls never participated in sport compared to 8% of boys. Gender-specific motivational factors exists for middle school youth - boys are more attracted to the competitive aspects of sports whereas girls are more motivated by the social opportunities that sports provide. Boys and girls who participate in sports are more physically active, so it is important to develop programs that children want to participate in and maximize retention |

|              |               |                                                                                                                                                                                                                                                                      |                    |                                                                                                                                                                                                                                                                                                                                                                                                                                                                                                                                                                                                                                             |
|--------------|---------------|----------------------------------------------------------------------------------------------------------------------------------------------------------------------------------------------------------------------------------------------------------------------|--------------------|---------------------------------------------------------------------------------------------------------------------------------------------------------------------------------------------------------------------------------------------------------------------------------------------------------------------------------------------------------------------------------------------------------------------------------------------------------------------------------------------------------------------------------------------------------------------------------------------------------------------------------------------|
| Stanish 2015 | United States | To assess physical activity enjoyment, perceived barriers, beliefs, and self-efficacy among adolescents with autism spectrum disorder (ASD) and to determine whether these factors differ from those in typically developing (TD) adolescents                        | Community          | Enjoyment of participating in individual sports did not differ between TD adolescents and adolescents with ASD. Adolescents with ASD were more likely to indicate a dislike for team sports. When asked what they'd like to do in their free time, 25% of adolescents with ASD selected "sports" compared to 58% of TD adolescents.                                                                                                                                                                                                                                                                                                         |
| Su 2019      | United States | To evaluate the extent of health literacy disparities in pediatric sports medicine populations.                                                                                                                                                                      | Clinic             | In self-reported general health literacy scores for guardians, literacy scores were associated with higher education, use of English as the primary language at home, private insurance, and female guardians. In contrast, age was the only factor affecting scores in the patient population. Among self-reported musculoskeletal health literacy and directly measured musculoskeletal literacy scores, there were significant differences in groups by age, primary language, and level of education.                                                                                                                                   |
| Thomas 2019  | Canada        | To (1) to examine the changes in the total amount, frequency, and type of PA and sport participation among Canadian first-year male and female university students (2) to examine the factors that promote or dissuade PA and sport engagement among these students. | College/University | PA and sports participation declined over the course of the year. Males engaged in more vigorous activity minutes, more strength training, and more organized sports than females. Females participated in more fitness activities than males. Intramural (noncompetitive and school organized) sport participation remained constant throughout the year. Significant intrapersonal barriers to PA engagement included stress and perceived self-skill; significant interpersonal barriers included lack of friends and peer influence; and significant structural barriers included homework, class schedule, and overcrowded facilities. |
| Tran 2021    | United States | To examine trends in functionally impairing depression, significant anxiety, suicidal ideation, and suicide attempts among college student-athletes across time, racial/ethnic group, and student-athlete standing.                                                  | College/University | Racial/ethnic comparisons pointed to relatively consistent heightened risks for depression and suicide concerns among Asian/Pacific Islander and Multiracial student-athletes compared to White student-athletes. Student-athlete status appeared most consistently to benefit White student-athletes, whereas there was evidence of potential liability of student-athlete status for Asian/Pacific Islander student-athletes.                                                                                                                                                                                                             |
| Tran 2022    | United States | To examine racial/ethnic variations in mental health stigma in relation to mental health psychotherapy utilization for student-athletes                                                                                                                              | College/University | MH utilization was similar between white and racial/ethnic minority student-athletes; however racial/ethnic minority athletes reported higher levels of personal and perceived public mental health stigma. Racial/ethnic minority student-athletes indicated greater financial stress, more depression symptomatology and lower perceived helpfulness of psychotherapy. Higher financial stress was associated with lower mental health utilization.                                                                                                                                                                                       |

|                |               |                                                                                                                                                                                                                                                                                                          |                    |                                                                                                                                                                                                                                                                                                                                                                                                                                                                                                                                                                                                                                                                                                                                                                                                      |
|----------------|---------------|----------------------------------------------------------------------------------------------------------------------------------------------------------------------------------------------------------------------------------------------------------------------------------------------------------|--------------------|------------------------------------------------------------------------------------------------------------------------------------------------------------------------------------------------------------------------------------------------------------------------------------------------------------------------------------------------------------------------------------------------------------------------------------------------------------------------------------------------------------------------------------------------------------------------------------------------------------------------------------------------------------------------------------------------------------------------------------------------------------------------------------------------------|
| Tran 2023      | United States | To examine if peer perceptions of stereotyped student groups' mental health needs varied by target race and student-athlete status                                                                                                                                                                       | Clinic             | <p>Black non-student athletes (BNSA) perceived to have less problematic levels of anxiety and addiction; yet significantly lower ratings of depression, suicidal ideation and insomnia were observed in this group compared to the Black student athlete and white student-athlete (WSA) groups. Similarly ADHD was perceived as less problematic in the BNSA group compared to WSA and WNSA.</p> <p>Study II: WSA demonstrated risk for anxiety, substance use, ADHD and learning disability. BSA reported higher rates of learning disability than BNSA. WSA reported higher rates of overwhelming anxiety compared to BSA</p> <p>Non-athletes reported higher average number of depressive symptoms than athletes. BSA reported higher mean number of nights with sleep disturbance than WSA.</p> |
| Walen 2020     | United States | To measure ATs' (1) perceived definition of transgender, (2) comfort and competence working with transgender student-athletes, (3) sources of education, (4) perceived legal concerns, and (5) perception of competitive advantage.                                                                      | College/University | 48% of participants believed they were competent in treating transgender patients, 46% felt competent in using appropriate terminology relating to transgender patients. ATs learned most frequently from media outlets (35%) or personal experiences (34%), and 35% received no education. 41% of ATs believed transgender female student-athletes had a competitive advantage                                                                                                                                                                                                                                                                                                                                                                                                                      |
| Wallace 2017   | United States | To determine differences in knowledge of concussion and reporting behaviors of high school athletes attending urban and suburban high schools and whether a relationship exists between underreporting and access to an athletic trainer in urban schools                                                | High School        | Athletes attending urban schools have less concussion knowledge than athletes attending suburban schools. No relationship was identified between reporting percentage and school type                                                                                                                                                                                                                                                                                                                                                                                                                                                                                                                                                                                                                |
| Wallace 2018 A | United States | To investigate differences between Black and White collegiate athletes on baseline neurocognitive performance and self-reported symptoms.                                                                                                                                                                | College/University | White athletes performed better than Black athletes on baseline visual motor processing speed and reaction time. Black athletes reported higher baseline symptom scores compared to Whites. There was no statistical difference between race on verbal memory or visual memory.                                                                                                                                                                                                                                                                                                                                                                                                                                                                                                                      |
| Wallace 2018 B | United States | identify if knowledge of concussion differences exists between communities that service underserved, African-American athletes compared to white athletes, and to explore differences in concussion knowledge between African-American and white athletes with and without access to an athletic trainer | High School        | White athletes had more concussion knowledge than African-American athletes; however, African-Americans that had access to an athletic trainer were more likely to identify the signs and symptoms of concussion compared to African-Americans that did not have access to an athletic trainer.                                                                                                                                                                                                                                                                                                                                                                                                                                                                                                      |

|                |               |                                                                                                                                                                                                                                                         |                    |                                                                                                                                                                                                                                                                                                                                                                                                                                                                                                                                                                                                         |
|----------------|---------------|---------------------------------------------------------------------------------------------------------------------------------------------------------------------------------------------------------------------------------------------------------|--------------------|---------------------------------------------------------------------------------------------------------------------------------------------------------------------------------------------------------------------------------------------------------------------------------------------------------------------------------------------------------------------------------------------------------------------------------------------------------------------------------------------------------------------------------------------------------------------------------------------------------|
| Wallace 2021 A | United States | To examine how Black and White collegiate-athletes differed in knowledge of concussion symptoms and use of concussion information sources.                                                                                                              | College/University | Black athletes were more likely to have lower concussion symptom knowledge scores than White athletes. White athletes more likely to report school-based professional, online medical sources and the NCAA as sources for concussion information; this is compared to referees among black student athletes                                                                                                                                                                                                                                                                                             |
| Wallace 2021 B | United States | To examine racial differences in concussion reporting behaviors between Black and White high school athletes.                                                                                                                                           | High School        | White athletes were more likely to recall experiencing a bell-ringer in games compared with Black athletes. They were also more likely to report a bell-ringer or concussion that occurred in a game. There was a significantly higher proportion of Black athletes compared with White athletes that did not report their bell-ringer experienced in games and concussions experienced in practices. White athletes were more likely than Black athletes to disclose a concussion because they thought they had a concussion, while there were no racial differences in the reasons for not reporting. |
| Wallace 2022 A | United States | To investigate whether concussion nondisclosure disparities existed by (1) race, (2) SES, or (3) AT health care access before college and understand the differential reasons for concussion nondisclosure between White and Black collegiate athletes. | College/University | Among the White and Black athletes, 15.6% and 17.7%, respectively, reported a history of concussion nondisclosure. No differences were found by race for distributions of history of concussion nondisclosure.                                                                                                                                                                                                                                                                                                                                                                                          |
| Wallace 2022 B | United States | To determine whether racial differences exist in the care pathway from injury to SRC clinic within adolescent athletes.                                                                                                                                 | Clinic             | No observed racial disparities in how athletes were initially managed and/or ultimately presented to an established SRC clinic (despite racial differences in school type and insurance coverage) were noted.                                                                                                                                                                                                                                                                                                                                                                                           |
| Wallace 2023   | United States | To examine neurocognitive performance and symptoms between concussed Black and White collegiate athletes at baseline, post-injury, and change from baseline to post-injury.                                                                             | College/University | At baseline, black male and female athletes scored lower on reaction time, white females scored higher on verbal memory, black females scored lower on visual motor processing speed. Post injury, black males scored lower on visual memory and VMS.                                                                                                                                                                                                                                                                                                                                                   |
| West 2019      | United States | To identify programmatic strategies that parks and recreation (P&R) agencies might pursue for promoting and facilitating team sports as a means of encouraging older women to remain physically active                                                  | Community          | P&R professionals can facilitate sport participation for older women by (1) tailored rules, (2) team organization and development, (3) player recruitment (4) promotion outlets, (5) facilities and resources available, (6) community and organizational support                                                                                                                                                                                                                                                                                                                                       |
| Wilkerson 2020 | United States | To examine the perceived barriers Black Division I football student-athletes face in seeking professional mental health services.                                                                                                                       | College/University | Two major themes were identified: (1) weakness- participant's views on stigma, toughness and time-constraints as a student-athlete and (2) Silence -awareness, community and relationships with family and coaches                                                                                                                                                                                                                                                                                                                                                                                      |
| Williams 2017  | United States | To compare adolescents with private and public insurance undergoing surgery for anterior cruciate ligament (ACL) and/or meniscal tears.                                                                                                                 | Clinic             | Patients with public insurance had a more delayed presentation than those with private insurance. They also tended to have more moderate-to-severe chondral injuries and meniscal tears that required debridement rather than repair                                                                                                                                                                                                                                                                                                                                                                    |

|                 |               |                                                                                                                                                                                                                   |        |                                                                                                                                                                                                                                                                                                                                                                                            |
|-----------------|---------------|-------------------------------------------------------------------------------------------------------------------------------------------------------------------------------------------------------------------|--------|--------------------------------------------------------------------------------------------------------------------------------------------------------------------------------------------------------------------------------------------------------------------------------------------------------------------------------------------------------------------------------------------|
| Wiznia 2017     | United States | To assess the effect of insurance type (Medicaid and private) on patient access to orthopaedic surgery sports medicine specialists for a semi-urgent evaluation of a likely operative bucket-handle meniscus tear | Clinic | Medicaid patients were significantly more likely to be denied an appointment due to lack of referral compared with private patients, and Medicaid patients were more likely to experience longer wait times for an appointment. Medicaid reimbursement for knee arthroscopy with meniscus repair was not significantly correlated with appointment success rate or patient waiting periods |
| Yengo-Kahn 2021 | United States | To compare White and Black athletes' recovery and subjective experiences after sport-related concussion (SRC).                                                                                                    | Clinic | Racial differences appear to exist in the outcomes and experience of SRC for young athletes, as Black athletes reached symptom resolution and return to school sooner than White athletes.                                                                                                                                                                                                 |
